# Supplementary material for: Collagen-based materials combined with microRNA for repairing cornea wounds and inhibiting scar formation
Source: Royal Society of Chemistry journal article supplement (doi:10.1039/c8bm01054d), 2018-11-01
Supplement: c8bm01054d1.pdf [file c8bm01054d1.pdf]

## Supporting information

### Collagen-based Materials Combined with MicroRNA for Repair

#### Cornea Wound and Inhibit Scar Formation

*Xuan Zhao,<sup>ab</sup> Wenjing Song,<sup>\*abcd</sup> Yawei Chen,<sup>bc</sup> Sa Liu,<sup>ab</sup> and Li Ren<sup>#abd</sup>*

*<sup>a</sup> School of Materials Science and Engineering, South China University of Technology,  
Guangzhou 510006, P. R. China*

*<sup>b</sup> National Engineering Research Center for Tissue Restoration and Reconstruction,  
Guangzhou 510006, P. R. China*

*<sup>c</sup> Key Laboratory of Biomedical Materials and Engineering of the Ministry of  
Education, South China University of Technology, Guangzhou 510006, P. R. China*

*<sup>d</sup> Sino-Singapore International Joint Research Institute, Guangzhou 510006, P. R.  
China*

*\* Author for correspondence:*

Wenjing Song, Ph.D., Email: [phsongwj@scut.edu.cn](mailto:phsongwj@scut.edu.cn)

*# Author for correspondence:*

Li Ren, Ph.D., Email: [pslirenl@scut.edu.cn](mailto:pslirenl@scut.edu.cn)

## **Materials and methods**

### **Integrity of miR-133b in collagen solution**

The integrity of naked miR-133b in different concentrations of collagen solution was tested with 1% agarose gel electrophoresis after incubation at room temperature for 24 h and 48 h.

### **Cellular Uptake of AuNP/miR-133b of Col-AMS and Col-AMI**

AuNP/ Cy3-labeled miR-133b was used to prepare Col-AMS and Col-AMI in order to test the cellular uptake after materials preparation. Col-AMS and Col-AMI were co-culture with rabbit corneal stromal cells by transwell (BD Biosciences). Cells were observed using confocal laser scanning microscopy (CLSM, Leica TCS SP8, Germany) after incubation for 8 h.

### **Release of AuNP/miR-133b of Col-AMS and Col-AMI *in vivo***

AuNP/ FAM-labeled miR-133b was used to prepare Col-AMS and Col-AMI to test the release ability in LKP model in New Zealand white rabbits. The operating procedure was same as 2.11 in the main text. The rabbit was sacrificed at 3 days after operation. Frozen section was made to examine the release of AuNP/miR-133b of Col-AMS and Col-AMI. Nuclei were localized by staining with DAPI (10 µg/mL). Images of sections were captured on confocal laser scanning microscopy (CLSM, Leica TCS SP8, Germany).

## Figures

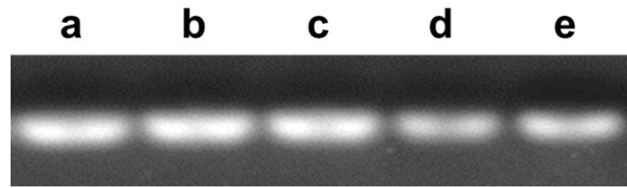

**Figure 1S.** Characterization of combination of PEI-capped AuNP and miR-133b: Integrity of naked miR-133b in collagen solution, a: Control; b: miR-133b mixed with collagen solution (0.1 g/L) for 24 h; c: miR-133b mixed with collagen solution (0.05 g/L) for 24 h; d: miR-133b mixed with collagen solution (0.1 g/L) for 48 h; e: miR-133b mixed with collagen solution (0.05 g/L) for 48 h.

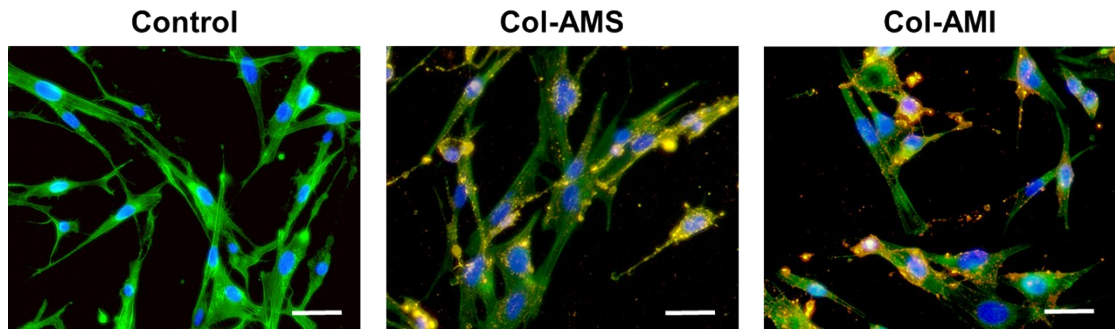

**Figure 2S.** Cellular uptake ability of AuNPs/miR-133b complexes released from Col-AMS and Col-AMI into corneal stromal cells (scale bar = 20  $\mu\text{m}$ ).

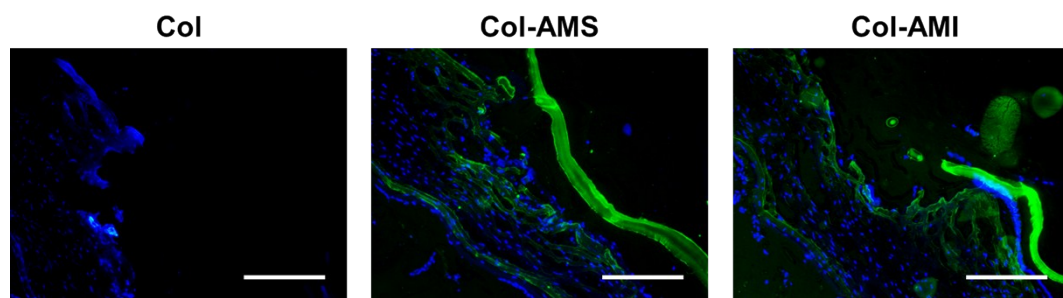

**Figure 3S.** Frozen section of different membranes transplanted into the ocular surface in rabbits. AuNP/ FAM-labeled miR-133b was used to prepare Col-AMS and Col-AMI (scale bar = 200  $\mu\text{m}$ ).

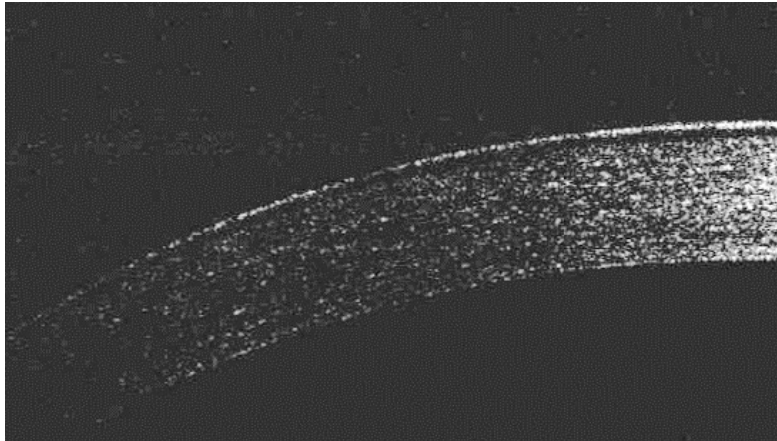

**Figure 4S.** OCT imaging of healthy cornea.
